# Supplementary material for: Inhibition of Phosphodiesterase-4 (PDE4) activity triggers luminal apoptosis and AKT dephosphorylation in a 3-D colonic-crypt model
Source: Mol Cancer. 2012 Jul 25;11:46. doi: 10.1186/1476-4598-11-46 (PMC3439292; doi:10.1186/1476-4598-11-46)
Supplement: Additional file 2 — Additional Table 2. List of the forward and reverse primers used to amplify PDE4 variants and β-actin. [file 1476-4598-11-46-S2.xls]

## Sheet: Sheet1
Additional Table 2. List of the forward and reverse primers used to amplify PDE4 isoforms and β-actin
PDE variant (GenBank no,)		Primer Name			Primer sequence
4A		4A pan F		ATG CAG ACC TAT CGC TCT GTC AGC
(L20965)		4A pan R		ACC ATC GTG TCC ACA GGG ATG C
4B		4B pan F		GAC ATT GCA ACA GAA GAC AAG TCC CC
(L20966)		4B pan R		ACT CAA GTA ACT GAA AGG CCA GGT GG
4C		4C pan F		ATG GAT GGT AAA GCC CTT TGG CTC TTG G
(L20968)		4C pan R		GTC TCC CTA AAT GGG TGG GAA AGT GAA G
4D		4D pan F		CCC TTG ACT GTT ATC ATG CAC ACC
(L20970)		4D pan R		GAT CTA CAT CAT GTA TTG CAC TGG C
4B1		4B1F		AAA GCA GGA GTG TGA TGA CGG
(L20966)		4B1R		CGT TGT CAA AGG CAG TGT GGT
4B2		4B2F		CCT TGA GAT GGC AAA GCA CTC
(L20971)		4B2R		AAT CAC AGT GGT GCT CTG CCT
4B3		4B3F		AAA AGC ATT CGG CAG CGT C
(U85048)		4B3R		TCG ACA TCG CCT TTG GTG A
4D1		4D1F		CTT TCC CTG TCT CTT CGC AGA
(U50157)		4D1R		GTG AGC TCC CGA TTA AGC ATC
4D2		4D2F		ATA TGA AGG AGC AGC CCT CAT G
(U50158)		4D2R		CCA GAC CGA CTC ATT TCA GAG A
4D3		4D3F		GCG AAC ATG ATG CAC GTG AA
(L20970)		4D3R		TGG CCA AGA CCT GAG CAA AT
4D4		4D4F		AGA AAT CCA GGA TGT CCT GGC
(L20969)		4D4R		TGC TAG GTG CTC GAT CTT GCA
4D5		4D5F		TGC CAG CTG TAC AAA GTT GAC C
(AF012073)		4D5R		TTC TCG GAG AGA TCA CTG GAG A
β-Actin		BAF		CAT CCG TAA AGA CCT CTA TGC CAA
(X00351)		BAR		ATG GAG CCA CCG ATC CAC A
